# Supplementary material for: Improving Microbial Biogasoline Production in Escherichia coli Using Tolerance Engineering
Source: PubMed Central journal article supplement — mBio. 2014 Nov 4;5(6):e01932-14. doi: 10.1128/mBio.01932-14 (PMC4222104; doi:10.1128/mbio.01932-14), 2014-11-04
Supplement: mbo005142049st1.pdf [file mbo005142049st1.pdf]

**Table S1. Description of microarray GEO #GSE53138.**

| COG Function Categories Distribution                          | Total | Up (by 2 fold) | Down (by 2 fold) | % differentially expressed |
|---------------------------------------------------------------|-------|----------------|------------------|----------------------------|
| Amino acid transport and metabolism                           | 360   | 36             | 93               | 35.83                      |
| Carbohydrate transport and metabolism                         | 367   | 30             | 63               | 25.34                      |
| Cell cycle control, cell division, chromosome partitioning    | 33    | 3              | 5                | 24.24                      |
| Cell motility                                                 | 109   | 15             | 2                | 15.60                      |
| Cell wall/membrane/envelope biogenesis                        | 222   | 22             | 52               | 33.33                      |
| Coenzyme transport and metabolism                             | 151   | 36             | 20               | 37.09                      |
| Defense mechanisms                                            | 45    | 7              | 6                | 28.89                      |
| Energy production and conversion                              | 286   | 34             | 58               | 32.17                      |
| Function unknown                                              | 314   | 45             | 20               | 20.70                      |
| General function prediction only                              | 400   | 48             | 36               | 21.00                      |
| Inorganic ion transport and metabolism                        | 215   | 24             | 23               | 21.86                      |
| Intracellular trafficking, secretion, and vesicular transport | 122   | 15             | 6                | 17.21                      |
| Lipid transport and metabolism                                | 100   | 6              | 17               | 23.00                      |
| Nucleotide transport and metabolism                           | 96    | 12             | 25               | 38.54                      |
| Posttranslational modification, protein turnover, chaperones  | 135   | 31             | 12               | 31.85                      |
| RNA processing and modification                               | 2     | 0              | 0                | 0.00                       |
| Replication, recombination and repair                         | 200   | 27             | 16               | 21.50                      |
| Secondary metabolites biosynthesis, transport and catabolism  | 64    | 7              | 11               | 28.13                      |
| Signal transduction mechanisms                                | 175   | 16             | 23               | 22.29                      |
| Transcription                                                 | 292   | 46             | 29               | 25.68                      |
| Translation, ribosomal structure and biogenesis               | 181   | 9              | 16               | 13.81                      |

**Top 100 up-regulated genes from microarray GEO #GSE53138.**

| Rank | Locus Tag | Gene name    | Gene description                                                                        | Mean Log Ratio | z score | GI#      | COG     | COGFun | COG Description                                                            |
|------|-----------|--------------|-----------------------------------------------------------------------------------------|----------------|---------|----------|---------|--------|----------------------------------------------------------------------------|
| 1    | b3686     | <i>ibpB</i>  | heat shock protein (VIMSS)                                                              | 6.52           | 2.77    | 90111637 | COG71   | O      | Molecular chaperone (small heat shock protein)                             |
| 2    | b3010     | <i>yqhC</i>  | putative ARAC-type regulatory protein (VIMSS)                                           | 6.10           | 2.79    | 90111526 | COG2207 | K      | AraC-type DNA-binding domain-containing proteins                           |
| 3    | b3687     | <i>ibpA</i>  | heat shock chaperone (NCBI)                                                             | 5.32           | 2.64    | 16131555 | COG71   | O      | Molecular chaperone (small heat shock protein)                             |
| 4    | b0355     | <i>frmB</i>  | predicted esterase (NCBI)                                                               | 5.04           | 2.52    | 16128340 | COG627  | R      | Predicted esterase                                                         |
| 5    | b1112     | <i>ycfR</i>  | hypothetical protein (NCBI)                                                             | 5.01           | 2.80    | 16129075 |         |        |                                                                            |
| 6    | b3011     | <i>yqhD</i>  | alcohol dehydrogenase, NAD(P)-dependent (NCBI)                                          | 4.80           | 2.82    | 16130909 | COG1979 | C      | Uncharacterized oxidoreductases, Fe-dependent alcohol dehydrogenase family |
| 7    | b3238     | <i>yhcN</i>  | orf, hypothetical protein (VIMSS)                                                       | 4.54           | 2.63    | 90111561 |         |        |                                                                            |
| 8    | b4326     | <i>yjiD</i>  | orf, hypothetical protein (VIMSS)                                                       | 4.39           | 2.47    | 90111730 |         |        |                                                                            |
| 9    | b1532     | <i>marB</i>  | hypothetical protein (NCBI)                                                             | 4.22           | 2.45    | 16129491 |         |        |                                                                            |
| 10   | b1531     | <i>marA</i>  | multiple antibiotic resistance; transcriptional activator of defense systems (VIMSS)    | 3.94           | 2.53    | 90111290 | COG2207 | K      | AraC-type DNA-binding domain-containing proteins                           |
| 11   | b2674     | <i>nrdI</i>  | hypothetical protein (NCBI)                                                             | 3.76           | 2.32    | 16130588 | COG1780 | F      | Protein involved in ribonucleotide reduction                               |
| 12   | b2673     | <i>nrdH</i>  | glutaredoxin-like protein (NCBI)                                                        | 3.75           | 2.31    | 16130587 | COG695  | O      | Glutaredoxin and related proteins                                          |
| 13   | b3014     | <i>yqhH</i>  | predicted outer membrane lipoprotein (NCBI)                                             | 3.70           | 2.63    | 16130912 | COG4238 | M      | Murein lipoprotein                                                         |
| 14   | b3013     | <i>yqhG</i>  | hypothetical protein (NCBI)                                                             | 3.65           | 2.86    | 49176301 |         |        |                                                                            |
| 15   | b1530     | <i>marR</i>  | multiple antibiotic resistance protein; repressor of mar operon (VIMSS)                 | 3.61           | 2.64    | 90111289 | COG1846 | K      | Transcriptional regulators                                                 |
| 16   | b0356     | <i>frmA</i>  | alcohol dehydrogenase class III/glutathione-dependent formaldehyde dehydrogenase (NCBI) | 3.58           | 2.44    | 16128341 | COG1062 | C      | Zn-dependent alcohol dehydrogenases, class III                             |
| 17   | b0849     | <i>grxA</i>  | glutaredoxin 1, redox coenzyme for ribonucleotide reductase (RNR1a) (NCBI)              | 3.58           | 2.82    | 16128817 | COG695  | O      | Glutaredoxin and related proteins                                          |
| 18   | b4062     | <i>soxS</i>  | DNA-binding transcriptional dual regulator (NCBI)                                       | 3.51           | 2.81    | 16131888 | COG2207 | K      | AraC-type DNA-binding domain-containing proteins                           |
| 19   | b1352     | <i>ydaD</i>  | orf, hypothetical protein (VIMSS)                                                       | 3.50           | 2.69    | 90111255 |         |        |                                                                            |
| 20   | b1649     | <i>ydhM</i>  | predicted DNA-binding transcriptional regulator (RefSeq)                                | 3.47           | 2.18    | 1.46E+08 | COG1309 | K      | Transcriptional regulator                                                  |
| 21   | b3012     | <i>yqhE</i>  | orf, hypothetical protein (VIMSS)                                                       | 3.46           | 2.55    | 90111527 | COG656  | R      | Aldo/keto reductases, related to diketogulonate reductase                  |
| 22   | b1611     | <i>fumC</i>  | fumarate hydratase (NCBI)                                                               | 3.35           | 2.85    | 16129569 | COG114  | C      | Fumarase                                                                   |
| 23   | b0447     | <i>ybaO</i>  | putative LRP-like transcriptional regulator (VIMSS)                                     | 3.27           | 2.83    | 90111137 | COG1522 | K      | Transcriptional regulators                                                 |
| 24   | b4642     | <i>yoeD</i>  |                                                                                         | 3.23           | 2.42    |          |         |        |                                                                            |
| 25   | b1355     | <i>b1355</i> | orf, hypothetical protein (VIMSS)                                                       | 3.06           | 2.56    | 90111257 |         |        |                                                                            |
| 26   | b4554     | <i>yibT</i>  | hypothetical protein (NCBI)                                                             | 2.99           | 2.52    | 94541127 |         |        |                                                                            |
| 27   | b0365     | <i>tauA</i>  | taurine transport system periplasmic protein (VIMSS)                                    | 2.95           | 1.81    | 90111122 | COG4521 | P      | ABC-type taurine transport system, periplasmic component                   |
| 28   | b1351     | <i>racC</i>  | Rac prophage; predicted protein (NCBI)                                                  | 2.93           | 2.64    | 16129312 |         |        |                                                                            |
| 29   | b0629     | <i>ybeF</i>  | putative transcriptional regulator LYSR-type (VIMSS)                                    | 2.93           | 2.56    | 90111155 | COG583  | K      | Transcriptional regulator                                                  |
| 30   | b0357     | <i>yaiN</i>  | putative alpha helix chain (VIMSS)                                                      | 2.93           | 2.90    | 1.62E+08 | COG1937 | S      | Uncharacterized protein conserved in bacteria                              |
| 31   | b0366     | <i>tauB</i>  | taurine transporter subunit (NCBI)                                                      | 2.92           | 1.69    | 16128351 | COG4525 | P      | ABC-type taurine transport system, ATPase component                        |
| 32   | b1111     | <i>ycfQ</i>  | orf, hypothetical protein (VIMSS)                                                       | 2.85           | 2.79    | 90111214 | COG1309 | K      | Transcriptional regulator                                                  |
| 33   | b2675     | <i>nrdE</i>  | ribonucleotide-diphosphate reductase alpha subunit (NCBI)                               | 2.80           | 2.37    | 16130589 | COG209  | F      | Ribonucleotide reductase, alpha subunit                                    |
| 34   | b1650     | <i>nema</i>  | N-ethylmaleimide reductase, FMN-linked (NCBI)                                           | 2.77           | 1.99    | 16129608 | COG1902 | C      | NADH:flavin oxidoreductases, Old Yellow Enzyme family                      |

**Top 100 up-regulated genes from microarray GEO #GSE53138.**

| Rank | Locus Tag | Gene name    | Gene description                                                                                                   | Mean Log Ratio | z score | GI#      | COG     | COGFun | COG Description                                                                                                         |
|------|-----------|--------------|--------------------------------------------------------------------------------------------------------------------|----------------|---------|----------|---------|--------|-------------------------------------------------------------------------------------------------------------------------|
| 35   | b0367     | <i>tauC</i>  | taurine transporter subunit (NCBI)                                                                                 | 2.77           | 1.62    | 16128352 | COG600  | P      | ABC-type nitrate/sulfonate/bicarbonate transport system, permease component                                             |
| 36   | b1838     | <i>pphA</i>  | protein phosphatase 1 modulates phosphoproteins, signals protein misfolding (VIMSS)                                | 2.74           | 2.60    | 90111344 |         |        |                                                                                                                         |
| 37   | b4060     | <i>yjcB</i>  | orf, hypothetical protein (VIMSS)                                                                                  | 2.74           | 2.40    | 90111681 |         |        |                                                                                                                         |
| 38   | b0448     | <i>mdlA</i>  | fused predicted multidrug transporter subunits of ABC superfamily: ATP-binding components (NCBI)                   | 2.72           | 2.52    | 16128433 | COG1132 | V      | ABC-type multidrug transport system, ATPase and permease components                                                     |
| 39   | b2732     | <i>ygbA</i>  | hypothetical protein (NCBI)                                                                                        | 2.70           | 2.80    | 16130639 |         |        |                                                                                                                         |
| 40   | b3160     | <i>yhbW</i>  | predicted enzyme (NCBI)                                                                                            | 2.68           | 2.23    | 16131052 | COG2141 | C      | Coenzyme F420-dependent N5,N10-methylene tetrahydromethanopterin reductase and related flavin-dependent oxidoreductases |
| 41   | b1378     | <i>ydbK</i>  | fused predicted pyruvate-flavodoxin oxidoreductase: conserved protein/conserved protein/FeS binding protein (NCBI) | 2.68           | 2.57    | 16129339 | COG674  | C      | Pyruvate:ferredoxin oxidoreductase and related 2-oxoacid:ferredoxin oxidoreductases, alpha subunit                      |
| 42   | b1463     | <i>nhoA</i>  | N-hydroxyarylamine O-acetyltransferase (NCBI)                                                                      | 2.63           | 2.56    | 16129422 | COG2162 | Q      | Arylamine N-acetyltransferase                                                                                           |
| 43   | b3917     | <i>sbp</i>   | sulfate transporter subunit (NCBI)                                                                                 | 2.62           | 1.92    | 16131755 | COG1613 | P      | ABC-type sulfate transport system, periplasmic component                                                                |
| 44   | b0449     | <i>mdlB</i>  | fused predicted multidrug transporter subunits of ABC superfamily: ATP-binding components (NCBI)                   | 2.57           | 2.55    | 16128434 | COG1132 | V      | ABC-type multidrug transport system, ATPase and permease components                                                     |
| 45   | b1167     | <i>ymgC</i>  | hypothetical protein (NCBI)                                                                                        | 2.55           | 2.17    | 16129130 |         |        |                                                                                                                         |
| 46   | b3101     | <i>yqjF</i>  | orf, hypothetical protein (VIMSS)                                                                                  | 2.52           | 2.43    | 90111539 | COG2259 | S      | Predicted membrane protein                                                                                              |
| 47   | b0851     | <i>nfsA</i>  | nitroreductase A, NADPH-dependent, FMN-dependent (NCBI)                                                            | 2.50           | 2.66    | 16128819 | COG778  | C      | Nitroreductase                                                                                                          |
| 48   | b0628     | <i>lipA</i>  | lipoyl synthase (NCBI)                                                                                             | 2.49           | 2.78    | 16128611 | COG320  | H      | Lipoate synthase                                                                                                        |
| 49   | b2104     | <i>thiM</i>  | hydroxyethylthiazole kinase (NCBI)                                                                                 | 2.49           | 2.44    | 16130042 | COG2145 | H      | Hydroxyethylthiazole kinase, sugar kinase family                                                                        |
| 50   | b2237     | <i>inaA</i>  | hypothetical protein (NCBI)                                                                                        | 2.49           | 2.42    | 16130172 |         |        |                                                                                                                         |
| 51   | b1322     | <i>ycjF</i>  | hypothetical protein (NCBI)                                                                                        | 2.48           | 2.79    | 16129283 | COG3768 | S      | Predicted membrane protein                                                                                              |
| 52   | b2531     | <i>iscR</i>  | DNA-binding transcriptional repressor (NCBI)                                                                       | 2.46           | 2.60    | 16130456 | COG1959 | K      | Predicted transcriptional regulator                                                                                     |
| 53   | b1164     | <i>ycgZ</i>  | hypothetical protein (NCBI)                                                                                        | 2.43           | 2.21    | 16129127 |         |        |                                                                                                                         |
| 54   | b1380     | <i>ldhA</i>  | D-lactate dehydrogenase (NCBI)                                                                                     | 2.43           | 2.50    | 16129341 | COG1052 | CHR    | Lactate dehydrogenase and related dehydrogenases                                                                        |
| 55   | b2681     | <i>ygaY</i>  | predicted transporter (pseudogene) (RefSeq)                                                                        | 2.42           | 2.26    |          |         |        |                                                                                                                         |
| 56   | b4527     | <i>b1354</i> | orf, hypothetical protein (VIMSS)                                                                                  | 2.41           | 1.97    | 94541091 |         |        |                                                                                                                         |
| 57   | b3924     | <i>fpr</i>   | ferredoxin-NADP reductase (NCBI)                                                                                   | 2.40           | 2.39    | 16131762 | COG1018 | C      | Flavodoxin reductases (ferredoxin-NADPH reductases) family 1                                                            |
| 58   | b1797     | <i>yeaR</i>  | hypothetical protein (NCBI)                                                                                        | 2.38           | 2.37    | 16129751 | COG3615 | P      | Uncharacterized protein/domain, possibly involved in tellurite resistance                                               |
| 59   | b1974     | <i>yodB</i>  | putative cytochrome (VIMSS)                                                                                        | 2.37           | 1.70    | 90111363 | COG3038 | C      | Cytochrome B561                                                                                                         |
| 60   | b0850     | <i>ybjC</i>  | predicted inner membrane protein (NCBI)                                                                            | 2.37           | 2.55    | 16128818 |         |        |                                                                                                                         |
| 61   | b1652     | <i>rnt</i>   | ribonuclease T (NCBI)                                                                                              | 2.36           | 2.50    | 16129610 | COG847  | L      | DNA polymerase III, epsilon subunit and related 3'-5' exonucleases                                                      |
| 62   | b2173     | <i>yeiR</i>  | predicted enzyme (NCBI)                                                                                            | 2.36           | 2.64    | 16130111 | COG523  | R      | Putative GTPases (G3E family)                                                                                           |
| 63   | b3685     | <i>yidE</i>  | putative transport protein (VIMSS)                                                                                 | 2.34           | 2.76    | 90111636 | COG2985 | R      | Predicted permease                                                                                                      |
| 64   | b3242     | <i>yhcR</i>  | orf, hypothetical protein (VIMSS)                                                                                  | 2.33           | 2.82    | 90111562 |         |        |                                                                                                                         |
| 65   | b2749     | <i>ygbE</i>  | conserved inner membrane protein (NCBI)                                                                            | 2.32           | 2.13    | 16130656 |         |        |                                                                                                                         |
| 66   | b1321     | <i>ycjX</i>  | conserved protein with nucleoside triphosphate hydrolase domain (NCBI)                                             | 2.32           | 2.64    | 16129282 | COG3106 | R      | Predicted ATPase                                                                                                        |
| 67   | b3828     | <i>metR</i>  | DNA-binding transcriptional activator, homocysteine-binding (NCBI)                                                 | 2.30           | 2.07    | 16131677 | COG583  | K      | Transcriptional regulator                                                                                               |
| 68   | b0368     | <i>tauD</i>  | taurine dioxygenase (NCBI)                                                                                         | 2.28           | 1.68    | 16128353 | COG2175 | Q      | Probable taurine catabolism dioxygenase                                                                                 |
| 69   | b1053     | <i>mdtG</i>  | predicted drug efflux system (NCBI)                                                                                | 2.22           | 2.79    | 16129016 | COG2814 | G      | Arabinose efflux permease                                                                                               |
| 70   | b2676     | <i>nrdF</i>  | ribonucleotide-diphosphate reductase beta subunit (NCBI)                                                           | 2.22           | 2.59    | 16130590 | COG208  | F      | Ribonucleotide reductase, beta subunit                                                                                  |
| 71   | b4011     | <i>yjaA</i>  | hypothetical protein (NCBI)                                                                                        | 2.22           | 2.10    | 16131837 |         |        |                                                                                                                         |
| 72   | b2582     | <i>trxC</i>  | thioredoxin 2 (NCBI)                                                                                               | 2.21           | 2.33    | 16130507 |         |        |                                                                                                                         |
| 73   | b0987     | <i>ymcD</i>  | orf, hypothetical protein (VIMSS)                                                                                  | 2.20           | 2.53    | 90111199 |         |        |                                                                                                                         |
| 74   | b2106     | <i>yohM</i>  | membrane protein conferring nickel and cobalt resistance (NCBI)                                                    | 2.19           | 2.28    | 16130044 | COG2215 | R      | ABC-type uncharacterized transport system, permease component                                                           |
| 75   | b0473     | <i>hspG</i>  | heat shock protein 90 (NCBI)                                                                                       | 2.19           | 2.79    | 16128457 | COG326  | O      | Molecular chaperone, HSP90 family                                                                                       |
| 76   | b1551     | <i>b1551</i> | orf, hypothetical protein (VIMSS)                                                                                  | 2.18           | 2.56    | 90111294 |         |        |                                                                                                                         |
| 77   | b3662     | <i>nepI</i>  | predicted transporter (RefSeq)                                                                                     | 2.18           | 2.16    | 1.46E+08 | COG2814 | G      | Arabinose efflux permease                                                                                               |
| 78   | b2667     | <i>ygaV</i>  | predicted DNA-binding transcriptional regulator (NCBI)                                                             | 2.17           | 2.58    | 16130581 | COG640  | K      | Predicted transcriptional regulators                                                                                    |
| 79   | b3740     | <i>gidB</i>  | glucose-inhibited division protein B (NCBI)                                                                        | 2.17           | 2.08    | 16131608 | COG357  | M      | Predicted S-adenosylmethionine-dependent methyltransferase involved in bacterial cell division                          |
| 80   | b4325     | <i>yjiC</i>  | orf, hypothetical protein (VIMSS)                                                                                  | 2.17           | 1.60    | 49176489 |         |        |                                                                                                                         |
| 81   | b3661     | <i>nlpA</i>  | cytoplasmic membrane lipoprotein-28 (NCBI)                                                                         | 2.16           | 2.09    | 16131531 | COG1464 | P      | ABC-type metal ion transport system, periplasmic component/surface antigen                                              |
| 82   | b0852     | <i>rimK</i>  | ribosomal protein S6 modification protein (NCBI)                                                                   | 2.14           | 2.37    | 16128820 | COG189  | HJ     | Glutathione synthase/Ribosomal protein S6 modification enzyme (glutaminyl transferase)                                  |
| 83   | b0476     | <i>aes</i>   | acetyl esterase (NCBI)                                                                                             | 2.14           | 2.59    | 16128460 | COG657  | I      | Esterase/lipase                                                                                                         |
| 84   | b1165     | <i>ymgA</i>  | hypothetical protein (NCBI)                                                                                        | 2.13           | 2.69    | 16129128 |         |        |                                                                                                                         |

**Top 100 up-regulated genes from microarray GEO #GSE53138.**

| Rank | Locus Tag | Gene name   | Gene description                                                                        | Mean Log Ratio | z score | GI#      | COG     | COGFun | COG Description                                                                                                                                                |
|------|-----------|-------------|-----------------------------------------------------------------------------------------|----------------|---------|----------|---------|--------|----------------------------------------------------------------------------------------------------------------------------------------------------------------|
| 85   | b1667     | <i>ydhR</i> | hypothetical protein (NCBI)                                                             | 2.13           | 2.64    | 16129623 |         |        |                                                                                                                                                                |
| 86   | b2592     | <i>clpB</i> | protein disaggregation chaperone (NCBI)                                                 | 2.12           | 2.20    | 16130513 | COG542  | O      | ATPases with chaperone activity, ATP-binding subunit                                                                                                           |
| 87   | b0156     | <i>yadR</i> | hypothetical protein (NCBI)                                                             | 2.10           | 2.44    | 16128149 | COG316  | S      | Uncharacterized conserved protein                                                                                                                              |
| 88   | b1231     | <i>tyrT</i> | tRNA-Tyr (NCBI)                                                                         | 2.06           | 2.52    | 1.46E+08 |         |        |                                                                                                                                                                |
| 89   | b2236     | <i>yfaE</i> | predicted 2Fe-2S cluster-containing protein (NCBI)                                      | 2.06           | 2.05    | 16130171 | COG633  | C      | Ferredoxin                                                                                                                                                     |
| 90   | b0871     | <i>poxB</i> | pyruvate dehydrogenase (NCBI)                                                           | 2.04           | 2.43    | 16128839 | COG28   | EH     | Thiamine pyrophosphate-requiring enzymes [acetolactate synthase, pyruvate dehydrogenase (cytochrome), glyoxylate carboligase, phosphonopyruvate decarboxylase] |
| 91   | b1379     | <i>hslJ</i> | heat-inducible protein (NCBI)                                                           | 2.03           | 2.14    | 16129340 | COG3187 | O      | Heat shock protein                                                                                                                                             |
| 92   | b4063     | <i>soxR</i> | DNA-binding transcriptional dual regulator, Fe-S center for redox-sensing (NCBI)        | 2.01           | 2.80    | 16131889 | COG789  | K      | Predicted transcriptional regulators                                                                                                                           |
| 93   | b2167     | <i>fruA</i> | fused fructose-specific PTS enzymes: IIBcomponent/IIC components (NCBI)                 | 2.00           | 2.05    | 16130105 | COG1299 | G      | Phosphotransferase system, fructose-specific IIC component                                                                                                     |
| 94   | b1623     | <i>add</i>  | adenosine deaminase (NCBI)                                                              | 2.00           | 2.51    | 16129581 | COG1816 | F      | Adenosine deaminase                                                                                                                                            |
| 95   | b2103     | <i>thiD</i> | phosphomethylpyrimidine kinase (NCBI)                                                   | 1.96           | 2.50    | 16130041 | COG351  | H      | Hydroxymethylpyrimidine/phosphomethylpyrimidine                                                                                                                |
| 96   | b4340     | <i>yjiR</i> | fused predicted DNA-binding transcriptional regulator/predicted aminotransferase (NCBI) | 1.94           | 2.43    | 16132161 | COG1167 | KE     | Transcriptional regulators containing a DNA-binding HTH domain and an aminotransferase domain (MocR family) and their eukaryotic orthologs                     |
| 97   | b4526     | <i>ydaE</i> | Rac prophage; conserved protein (NCBI)                                                  | 1.94           | 2.21    | 94541109 |         |        |                                                                                                                                                                |
| 98   | b3461     | <i>rpoH</i> | RNA polymerase sigma factor (NCBI)                                                      | 1.94           | 2.35    | 16131333 | COG568  | K      | DNA-directed RNA polymerase, sigma subunit (sigma70/sigma32)                                                                                                   |
| 99   | b1110     | <i>ycfJ</i> | hypothetical protein (NCBI)                                                             | 1.93           | 2.23    | 16129073 | COG3134 | S      | Predicted outer membrane lipoprotein                                                                                                                           |
| 100  | b0439     | <i>lon</i>  | DNA-binding ATP-dependent protease La (NCBI)                                            | 1.91           | 2.56    | 16128424 | COG466  | O      | ATP-dependent Lon protease, bacterial type                                                                                                                     |

**Top 100 down-regulated genes from microarray GEO #GSE53138.**

| Rank | Locus Tag | Gene name   | Gene description                                                                                                                | Mean Log Ratio | z score | GI#      | COG     | COGFun | COG Description                                                                         |
|------|-----------|-------------|---------------------------------------------------------------------------------------------------------------------------------|----------------|---------|----------|---------|--------|-----------------------------------------------------------------------------------------|
| 1    | b3512     | <i>gadE</i> | acid-responsive regulator of gadA and gadBC (Katherine Huang)                                                                   | -5.26          | -2.45   | 16131384 |         |        |                                                                                         |
| 2    | b0342     | <i>lacA</i> | galactoside O-acetyltransferase (NCBI)                                                                                          | -5.25          | -2.45   | 16128327 | COG110  | R      | Acetyltransferase (isoleucine patch superfamily)                                        |
| 3    | b3506     | <i>slp</i>  | outer membrane protein induced after carbon starvation (VIMSS)                                                                  | -4.95          | -2.36   | 90111603 | COG3065 | M      | Starvation-inducible outer membrane lipoprotein                                         |
| 4    | b3509     | <i>hdeB</i> | orf, hypothetical protein (VIMSS)                                                                                               | -4.89          | -2.39   | 1.62E+08 |         |        |                                                                                         |
| 5    | b3510     | <i>hdeA</i> | acid-resistance protein, possible chaperone , subunit of HdeA dimer, inactive form of acid-resistance protein (Katherine Huang) | -4.78          | -2.60   | 16131382 |         |        |                                                                                         |
| 6    | b1494     | <i>pqQL</i> | predicted peptidase (NCBI)                                                                                                      | -4.40          | -2.12   | 16129452 | COG612  | R      | Predicted Zn-dependent peptidases                                                       |
| 7    | b0336     | <i>codB</i> | cytosine transporter (NCBI)                                                                                                     | -4.28          | -2.63   | 16128321 | COG1457 | F      | Purine-cytosine permease and related proteins                                           |
| 8    | b0344     | <i>lacZ</i> | beta-D-galactosidase (NCBI)                                                                                                     | -4.26          | -2.57   | 16128329 | COG3250 | G      | Beta-galactosidase/beta-glucuronidase                                                   |
| 9    | b3517     | <i>gadA</i> | glutamate decarboxylase A, PLP-dependent (NCBI)                                                                                 | -4.23          | -1.92   | 16131389 | COG76   | E      | Glutamate decarboxylase and related PLP-dependent proteins                              |
| 10   | b3511     | <i>hdeD</i> | acid-resistance membrane protein (NCBI)                                                                                         | -4.17          | -2.23   | 16131383 | COG3247 | S      | Uncharacterized conserved protein                                                       |
| 11   | b0343     | <i>lacY</i> | galactoside permease (NCBI)                                                                                                     | -4.15          | -2.50   | 16128328 |         |        |                                                                                         |
| 12   | b0033     | <i>carB</i> | carbamoyl-phosphate synthase large subunit (NCBI)                                                                               | -4.14          | -2.80   | 16128027 | COG458  | EF     | Carbamoylphosphate synthase large subunit (split gene in MJ)                            |
| 13   | b2000     | <i>flu</i>  | CP4-44 prophage; antigen 43 (Ag43) phase-variable biofilm formation autotransporter (NCBI)                                      | -4.08          | -2.64   | 49176177 | COG3468 | MU     | Type V secretory pathway, adhesin AidA                                                  |
| 14   | b0485     | <i>ybaS</i> | predicted glutaminase (NCBI)                                                                                                    | -4.04          | -2.43   | 16128469 | COG2066 | E      | Glutaminase                                                                             |
| 15   | b2035     | <i>wbbH</i> | O-antigen polymerase (NCBI)                                                                                                     | -3.83          | -2.84   | 16129975 |         |        |                                                                                         |
| 16   | b0728     | <i>sucC</i> | succinyl-CoA synthetase subunit beta (NCBI)                                                                                     | -3.76          | -2.80   | 16128703 | COG45   | C      | Succinyl-CoA synthetase, beta subunit                                                   |
| 17   | b1493     | <i>gadB</i> | glutamate decarboxylase B, PLP-dependent (NCBI)                                                                                 | -3.73          | -2.11   | 16129451 | COG76   | E      | Glutamate decarboxylase and related PLP-dependent proteins                              |
| 18   | b3508     | <i>yhiD</i> | predicted Mg(2+) transport ATPase inner membrane protein (NCBI)                                                                 | -3.65          | -2.52   | 16131380 | COG1285 | S      | Uncharacterized membrane protein                                                        |
| 19   | b4354     | <i>yjiY</i> | putative carbon starvation protein (VIMSS)                                                                                      | -3.61          | -2.63   | 90111739 | COG1966 | T      | Carbon starvation protein, predicted membrane protein                                   |
| 20   | b0032     | <i>carA</i> | carbamoyl-phosphate synthase small subunit (NCBI)                                                                               | -3.60          | -2.54   | 16128026 | COG505  | EF     | Carbamoylphosphate synthase small subunit                                               |
| 21   | b4034     | <i>malE</i> | maltose ABC transporter periplasmic protein (NCBI)                                                                              | -3.55          | -2.13   | 16131860 | COG2182 | G      | Maltose-binding periplasmic proteins/domains                                            |
| 22   | b3460     | <i>livJ</i> | leucine/isoleucine/valine transporter subunit (NCBI)                                                                            | -3.54          | -2.47   | 49176358 | COG683  | E      | ABC-type branched-chain amino acid transport systems, periplasmic component             |
| 23   | b3749     | <i>rbsA</i> | fused D-ribose transporter subunits of ABC superfamily: ATP-binding components (NCBI)                                           | -3.53          | -2.45   | 16131617 | COG1129 | G      | ABC-type sugar transport system, ATPase component                                       |
| 24   | b0726     | <i>sucA</i> | alpha-ketoglutarate decarboxylase (NCBI)                                                                                        | -3.53          | -2.88   | 16128701 | COG567  | C      | 2-oxoglutarate dehydrogenase complex, dehydrogenase (E1) component, and related enzymes |
| 25   | b2032     | <i>wbK</i>  | lipopolysaccharide biosynthesis protein (NCBI)                                                                                  | -3.49          | -2.77   | 16129972 | COG438  | M      | Glycosyltransferase                                                                     |
| 26   | b0722     | <i>sdhD</i> | succinate dehydrogenase cytochrome b556 small membrane subunit (NCBI)                                                           | -3.47          | -2.70   | 16128697 | COG2142 | C      | Succinate dehydrogenase, hydrophobic anchor subunit                                     |
| 27   | b0729     | <i>sucD</i> | succinyl-CoA synthetase subunit alpha (NCBI)                                                                                    | -3.46          | -2.80   | 16128704 | COG74   | C      | Succinyl-CoA synthetase, alpha subunit                                                  |
| 28   | b0287     | <i>yagU</i> | conserved inner membrane protein (NCBI)                                                                                         | -3.46          | -2.34   | 16128272 | COG3477 | S      | Predicted periplasmic/secreted protein                                                  |
| 29   | b0723     | <i>sdhA</i> | succinate dehydrogenase flavoprotein subunit (NCBI)                                                                             | -3.45          | -2.65   | 16128698 | COG1053 | C      | Succinate dehydrogenase/fumarate reductase, flavoprotein subunit                        |

Top 100 down-regulated genes from microarray GEO #GSE53138.

| Rank | Locus Tag | Gene name    | Gene description                                                                                    | Mean Log Ratio | z score | GI#      | COG     | COGFun | COG Description                                                                                                          |
|------|-----------|--------------|-----------------------------------------------------------------------------------------------------|----------------|---------|----------|---------|--------|--------------------------------------------------------------------------------------------------------------------------|
| 30   | b0595     | <i>entB</i>  | isochorismatase (NCBI)                                                                              | -3.40          | -2.68   | 16128578 | COG1535 | Q      | Isochorismate hydrolase                                                                                                  |
| 31   | b4245     | <i>pyrB</i>  | aspartate carbamoyltransferase catalytic subunit (NCBI)                                             | -3.39          | -2.43   | 16132067 | COG540  | F      | Aspartate carbamoyltransferase, catalytic chain                                                                          |
| 32   | b3623     | <i>rfaK</i>  | lipopolysaccharide core biosynthesis (NCBI)                                                         | -3.38          | -2.16   | 16131494 | COG859  | M      | ADP-heptose:LPS heptosyltransferase                                                                                      |
| 33   | b0727     | <i>sucB</i>  | dihydrolipoamide acetyltransferase (NCBI)                                                           | -3.35          | -2.81   | 16128702 | COG508  | C      | Pyruvate/2-oxoglutarate dehydrogenase complex, dihydrolipoamide acyltransferase (E2) component, and related enzymes      |
| 34   | b0721     | <i>sdhC</i>  | succinate dehydrogenase cytochrome b556 large membrane subunit (NCBI)                               | -3.34          | -2.55   | 16128696 | COG2009 | C      | Succinate dehydrogenase/fumarate reductase, cytochrome b subunit                                                         |
| 35   | b0004     | <i>thrC</i>  | threonine synthase (NCBI)                                                                           | -3.29          | -2.41   | 16127998 | COG498  | E      | Threonine synthase                                                                                                       |
| 36   | b4571     | <i>wbbL</i>  |                                                                                                     | -3.28          | -2.56   |          |         |        |                                                                                                                          |
| 37   | b3750     | <i>rbsC</i>  | ribose ABC transporter permease protein (NCBI)                                                      | -3.27          | -2.29   | 16131618 | COG1172 | G      | Ribose/xylose/arabinose/galactoside ABC-type transport systems, permease components                                      |
| 38   | b2034     | <i>wbbI</i>  | hypothetical protein (NCBI)                                                                         | -3.27          | -2.86   | 16129974 |         |        |                                                                                                                          |
| 39   | b4069     | <i>acs</i>   | acetyl-coenzyme A synthetase (NCBI)                                                                 | -3.17          | -2.53   | 16131895 | COG365  | I      | Acyl-coenzyme A synthetases/AMP-(fatty) acid ligases                                                                     |
| 40   | b0003     | <i>thrB</i>  | homoserine kinase (NCBI)                                                                            | -3.15          | -2.48   | 16127997 | COG83   | E      | Homoserine kinase                                                                                                        |
| 41   | b0565     | <i>ompT</i>  | DLP12 prophage; outer membrane protease VII (outer membrane protein 3b) (NCBI)                      | -3.14          | -2.47   | 16128548 | COG4571 | M      | Outer membrane protease                                                                                                  |
| 42   | b0724     | <i>sdhB</i>  | succinate dehydrogenase, FeS subunit (NCBI)                                                         | -3.10          | -2.35   | 16128699 | COG479  | C      | Succinate dehydrogenase/fumarate reductase, Fe-S protein subunit                                                         |
| 43   | b0002     | <i>thrA</i>  | bifunctional aspartokinase I/homoserine dehydrogenase I (NCBI)                                      | -3.03          | -2.50   | 16127996 | COG527  | E      | Aspartokinases                                                                                                           |
| 44   | b3626     | <i>rfaJ</i>  | UDP-D-glucose:(galactosyl)lipopolysaccharide glucosyltransferase (NCBI)                             | -2.99          | -2.58   | 16131497 | COG1442 | M      | Lipopolysaccharide biosynthesis proteins, LPS:glycosyltransferases                                                       |
| 45   | b3748     | <i>rbsD</i>  | D-ribose high-affinity transport system; membrane-associated protein (VIMSS)                        | -2.97          | -2.34   | 90111647 | COG1869 | G      | ABC-type ribose transport system, auxiliary component                                                                    |
| 46   | b0354     | <i>yaiL</i>  | nucleoprotein/polynucleotide-associated enzyme (VIMSS)                                              | -2.95          | -2.33   | 90111118 | COG3122 | S      | Uncharacterized protein conserved in bacteria                                                                            |
| 47   | b4244     | <i>pyrI</i>  | aspartate carbamoyltransferase regulatory subunit (NCBI)                                            | -2.95          | -2.42   | 16132066 | COG1781 | F      | Aspartate carbamoyltransferase, regulatory subunit                                                                       |
| 48   | b3469     | <i>zntA</i>  | zinc, cobalt and lead efflux system (NCBI)                                                          | -2.93          | -1.48   | 16131341 | COG2217 | P      | Cation transport ATPase                                                                                                  |
| 49   | b3513     | <i>mdtE</i>  | multidrug resistance efflux transporter (NCBI)                                                      | -2.92          | -1.94   | 16131385 | COG845  | M      | Membrane-fusion protein                                                                                                  |
| 50   | b2240     | <i>glpT</i>  | sn-glycerol-3-phosphate transporter (NCBI)                                                          | -2.88          | -2.30   | 16130175 | COG2271 | G      | Sugar phosphate permease                                                                                                 |
| 51   | b2579     | <i>yfiD</i>  | pyruvate formate lyase subunit (NCBI)                                                               | -2.88          | -2.12   | 16130504 | COG3445 | R      | Acid-induced glycol radical enzyme                                                                                       |
| 52   | b4035     | <i>malK</i>  | fused maltose transport subunit, ATP-binding component of ABC superfamily/regulatory protein (NCBI) | -2.87          | -1.95   | 16131861 | COG3839 | G      | ABC-type sugar transport systems, ATPase components                                                                      |
| 53   | b2370     | <i>evgS</i>  | hybrid sensory histidine kinase in two-component regulatory system with EvgA (NCBI)                 | -2.86          | -2.56   | 16130302 | COG3290 | T      | Signal transduction histidine kinase regulating citrate/malate metabolism                                                |
| 54   | b4036     | <i>lamB</i>  | maltoporin precursor (NCBI)                                                                         | -2.83          | -1.80   | 16131862 | COG4580 | G      | Maltoporin (phage lambda and maltose receptor)                                                                           |
| 55   | b1817     | <i>manX</i>  | fused mannose-specific PTS enzymes: IIA component/IIB component (NCBI)                              | -2.81          | -2.64   | 16129771 | COG3444 | G      | Phosphotransferase system, mannose/fructose/N-acetylgalactosamine-specific component IIB                                 |
| 56   | b2276     | <i>nuoN</i>  | NADH:ubiquinone oxidoreductase, membrane subunit N (RefSeq)                                         | -2.78          | -2.56   | 1.46E+08 | COG1007 | C      | NADH:ubiquinone oxidoreductase subunit 2 (chain N)                                                                       |
| 57   | b3531     | <i>bcsZ</i>  | endo-1,4-D-glucanase (NCBI)                                                                         | -2.76          | -2.69   | 16131403 | COG3405 | G      | Endoglucanase Y                                                                                                          |
| 58   | b4068     | <i>ycjH</i>  | conserved inner membrane protein involved in acetate transport (NCBI)                               | -2.76          | -2.06   | 16131894 | COG3162 | S      | Predicted membrane protein                                                                                               |
| 59   | b4254     | <i>argI</i>  | ornithine carbamoyltransferase I (NCBI)                                                             | -2.73          | -2.44   | 16132076 | COG78   | E      | Ornithine carbamoyltransferase                                                                                           |
| 60   | b2277     | <i>nuoM</i>  | NADH dehydrogenase subunit M (NCBI)                                                                 | -2.73          | -2.74   | 16130212 | COG1008 | C      | NADH:ubiquinone oxidoreductase subunit 4 (chain M)                                                                       |
| 61   | b2037     | <i>rfbX</i>  | predicted polysiprenol-linked O-antigen transporter (NCBI)                                          | -2.73          | -2.79   | 16129977 | COG2244 | R      | Membrane protein involved in the export of O-antigen and teichoic acid                                                   |
| 62   | b1818     | <i>manY</i>  | mannose-specific enzyme IIC component of PTS (NCBI)                                                 | -2.72          | -2.81   | 16129772 | COG3715 | G      | Phosphotransferase system, mannose/fructose/N-acetylgalactosamine-specific component IIC                                 |
| 63   | b2028     | <i>ugd</i>   | UDP-glucose 6-dehydrogenase (NCBI)                                                                  | -2.71          | -2.41   | 16129969 | COG1004 | M      | Predicted UDP-glucose 6-dehydrogenase                                                                                    |
| 64   | b2033     | <i>wbbJ</i>  | predicted acyl transferase (NCBI)                                                                   | -2.70          | -2.40   | 16129973 | COG110  | R      | Acetyltransferase (isoleucine patch superfamily)                                                                         |
| 65   | b0486     | <i>ybaT</i>  | predicted transporter (NCBI)                                                                        | -2.66          | -2.68   | 16128470 | COG1113 | E      | Gamma-aminobutyrate permease and related permeases                                                                       |
| 66   | b2278     | <i>nuoL</i>  | NADH dehydrogenase subunit L (NCBI)                                                                 | -2.65          | -2.76   | 16130213 | COG1009 | CP     | NADH:ubiquinone oxidoreductase subunit 5 (chain L)/Multisubunit Na <sup>+</sup> /H <sup>+</sup> antiporter, MnhA subunit |
| 67   | b2601     | <i>aroF</i>  | 3-deoxy-D-arabino-heptulosonate-7-phosphate synthase, tyrosine-repressible (NCBI)                   | -2.63          | -2.56   | 16130522 | COG722  | E      | 3-deoxy-D-arabino-heptulosonate 7-phosphate (DAHP) synthase                                                              |
| 68   | b3627     | <i>rfaI</i>  | UDP-D-galactose:(glucosyl)lipopolysaccharide-alpha-1,3-D-galactosyltransferase (NCBI)               | -2.61          | -2.43   | 16131498 | COG1442 | M      | Lipopolysaccharide biosynthesis proteins, LPS:glycosyltransferases                                                       |
| 69   | b2036     | <i>glf</i>   | UDP-galactopyranose mutase, FAD/NAD(P)-binding (NCBI)                                               | -2.61          | -2.18   | 16129976 | COG562  | M      | UDP-galactopyranose mutase                                                                                               |
| 70   | b4108     | <i>phnA</i>  | hypothetical protein (NCBI)                                                                         | -2.61          | -2.45   | 16131934 | COG2824 | P      | Uncharacterized Zn-ribbon-containing protein involved in phosphonate metabolism                                          |
| 71   | b3744     | <i>asnA</i>  | asparagine synthetase AsnA (NCBI)                                                                   | -2.60          | -2.39   | 16131612 | COG2502 | E      | Asparagine synthetase A                                                                                                  |
| 72   | b2001     | <i>b2001</i> | orf, hypothetical protein (VIMSS)                                                                   | -2.60          | -2.58   | 90111368 |         |        |                                                                                                                          |
| 73   | b2838     | <i>lysA</i>  | diaminopimelate decarboxylase, PLP-binding (NCBI)                                                   | -2.56          | -2.25   | 16130742 | COG19   | E      | Diaminopimelate decarboxylase                                                                                            |
| 74   | b3629     | <i>rfaS</i>  | lipopolysaccharide core biosynthesis protein (NCBI)                                                 | -2.54          | -2.38   | 16131500 |         |        |                                                                                                                          |
| 75   | b3418     | <i>malT</i>  | transcriptional regulator MalT (NCBI)                                                               | -2.53          | -2.34   | 16131294 | COG2909 | K      | ATP-dependent transcriptional regulator                                                                                  |
| 76   | b1415     | <i>aldA</i>  | aldehyde dehydrogenase A, NAD-linked (NCBI)                                                         | -2.51          | -2.25   | 16129376 | COG1012 | C      | NAD-dependent aldehyde dehydrogenases                                                                                    |

Top 100 down-regulated genes from microarray GEO #GSE53138.

| Rank | Locus Tag | Gene name   | Gene description                                                                                          | Mean Log Ratio | z score | GI#      | COG     | COGFun | COG Description                                                                             |
|------|-----------|-------------|-----------------------------------------------------------------------------------------------------------|----------------|---------|----------|---------|--------|---------------------------------------------------------------------------------------------|
| 77   | b2497     | <i>uraA</i> | uracil transporter (NCBI)                                                                                 | -2.49          | -2.43   | 16130422 | COG2233 | F      | Xanthine/uracil permeases                                                                   |
| 78   | b3751     | <i>rbsB</i> | D-ribose transporter subunit (NCBI)                                                                       | -2.49          | -2.45   | 16131619 | COG1879 | G      | ABC-type sugar transport system, periplasmic component                                      |
| 79   | b2094     | <i>gatA</i> | galactitol-specific enzyme IIA component of PTS (NCBI)                                                    | -2.47          | -2.30   | 16130032 | COG1762 | GT     | Phosphotransferase system mannitol/fructose-specific IIA domain (Ntr-type)                  |
| 80   | b3507     | <i>dctR</i> | protein involved in metabolism of C4-dicarboxylates (Katherine Huang)                                     | -2.47          | -2.29   | 16131379 | COG2197 | TK     | Response regulator containing a CheY-like receiver domain and an HTH DNA-binding domain     |
| 81   | b2600     | <i>tyrA</i> | fused chorismate mutase T/prephenate dehydrogenase (NCBI)                                                 | -2.46          | -2.39   | 16130521 | COG287  | E      | Prephenate dehydrogenase                                                                    |
| 82   | b1656     | <i>sodB</i> | superoxide dismutase, Fe (NCBI)                                                                           | -2.46          | -2.77   | 16129614 | COG605  | P      | Superoxide dismutase                                                                        |
| 83   | b4015     | <i>aceA</i> | isocitrate lyase (NCBI)                                                                                   | -2.45          | -2.41   | 16131841 | COG2224 | C      | Isocitrate lyase                                                                            |
| 84   | b0594     | <i>entE</i> | 2,3-dihydroxybenzoate-AMP ligase component of enterobactin synthase multienzyme complex (NCBI)            | -2.44          | -1.88   | 16128577 | COG1021 | Q      | Peptide arylation enzymes                                                                   |
| 85   | b0596     | <i>entA</i> | 2,3-dihydroxybenzoate-2,3-dehydrogenase (NCBI)                                                            | -2.44          | -2.62   | 16128579 | COG1028 | IQR    | Dehydrogenases with different specificities (related to short-chain alcohol dehydrogenases) |
| 86   | b4348     | <i>hsdS</i> | specificity determinant for hsdM and hsdR (NCBI)                                                          | -2.41          | -2.60   | 16132169 | COG732  | V      | Restriction endonuclease S subunits                                                         |
| 87   | b3625     | <i>rfaY</i> | lipopolysaccharide core biosynthesis protein (NCBI)                                                       | -2.38          | -2.09   | 16131496 |         |        |                                                                                             |
| 88   | b2095     | <i>gatZ</i> | D-tagatose 1,6-bisphosphate aldolase 2, subunit (NCBI)                                                    | -2.37          | -2.35   | 16130033 | COG4573 | G      | Predicted tagatose 6-phosphate kinase                                                       |
| 89   | b2279     | <i>nuoK</i> | NADH dehydrogenase subunit K (NCBI)                                                                       | -2.37          | -2.79   | 16130214 | COG713  | C      | NADH:ubiquinone oxidoreductase subunit 11 or 4L (chain K)                                   |
| 90   | b2029     | <i>gnd</i>  | 6-phosphogluconate dehydrogenase (NCBI)                                                                   | -2.33          | -2.79   | 16129970 | COG362  | G      | 6-phosphogluconate dehydrogenase                                                            |
| 91   | b3540     | <i>dppF</i> | dipeptide transporter (NCBI)                                                                              | -2.32          | -2.45   | 16131412 | COG4608 | E      | ABC-type oligopeptide transport system, ATPase component                                    |
| 92   | b2024     | <i>hisA</i> | N-(5'-phospho-L-ribosyl-formimino)-5-amino-1-(5'-phosphoribosyl)-4-imidazolecarboxamide isomerase (VIMSS) | -2.31          | -2.32   | 90111374 | COG106  | E      | Phosphoribosylformimino-5-aminoimidazole carboxamide ribonucleotide (ProFAR) isomerase      |
| 93   | b4519     | <i>icdC</i> |                                                                                                           | -2.30          | -2.44   |          |         |        |                                                                                             |
| 94   | b0929     | <i>ompF</i> | outer membrane porin 1a (Ia;b;F) (NCBI)                                                                   | -2.28          | -2.62   | 16128896 | COG3203 | M      | Outer membrane protein (porin)                                                              |
| 95   | b0273     | <i>argF</i> | CP4-6 prophage; ornithine carbamoyltransferase 2, chain F (NCBI)                                          | -2.28          | -2.29   | 16128258 | COG78   | E      | Ornithine carbamoyltransferase                                                              |
| 96   | b2025     | <i>hisF</i> | imidazole glycerol phosphate synthase subunit HisF (NCBI)                                                 | -2.28          | -2.33   | 16129966 | COG107  | E      | Imidazoleglycerol-phosphate synthase                                                        |
| 97   | b3624     | <i>rfaZ</i> | lipopolysaccharide core biosynthesis protein (NCBI)                                                       | -2.27          | -2.45   | 16131495 |         |        |                                                                                             |
| 98   | b2096     | <i>gatY</i> | tagatose-bisphosphate aldolase I (VIMSS)                                                                  | -2.26          | -2.32   | 90111384 | COG191  | G      | Fructose/tagatose bisphosphate aldolase                                                     |
| 99   | b3870     | <i>glnA</i> | glutamine synthetase (NCBI)                                                                               | -2.26          | -2.79   | 16131710 | COG174  | E      | Glutamine synthetase                                                                        |
| 100  | b3416     | <i>malQ</i> | 4-alpha-glucanotransferase (amylomaltase) (NCBI)                                                          | -2.25          | -2.59   | 16131292 | COG1640 | G      | 4-alpha-glucanotransferase                                                                  |
